# Supplementary material for: An Objective Approach to Identify Priority Rare Diseases for the Development of Solutions Reducing the Diagnostic Delay Based on French Data
Source: Front Pharmacol. 2021 Oct 22;12:734601. doi: 10.3389/fphar.2021.734601 (PMC8570372; doi:10.3389/fphar.2021.734601)
Supplement: Supplementary file 2 [file Table1.xlsx]

## Sheet: Feuil1
Additional Table 1: Detailed list of open access information sources used to identify rare diseases for which a delayed diagnosis would be especially detrimental, in the context of the study.
	Source # 1		Source # 2			Source #3		Source #4	Source #5
Objective	Identification of RD for which a commercial drug with a MA is available		Identification of RD for which a drug is available as part of an ATU			Identification of RD with published NDCP		Identification of RD with under writing NDCP	Merger, duplicates removal and mapping of pathologies with the Orphanet nomenclature
Title	List of Orphan drugs (OD) intended for RD and with a Marketing Authorization in the European Union (EU)	List of non-Orphan (NON-OD) drugs intended for RD and with a Marketing Authorization in the European Union (EU)	List of drugs with an Authorization for Temporary Use (ATU) in France	List of drugs with an Authorization for Temporary Use (ATU) in France	List of drugs with Rare disease (Orphan) designations granted by the EMA	List of diagnosis and care protocols published by the French national rare disease healthcare networks (FSMR)	List of diagnosis and care protocols published by the French national rare disease healthcare networks (FSMR)	List of PNDS in the course of production or announced by the FSMR (Reports of the days of the sectors of Health)	Orphanet RD database
Source	Orphanet	Orphanet	French general directorate for care provision, "Direction Générale de l'Offre de Soins" (DGOS)	French Agency for the Safety of Health Products, "Agence nationale de sécurité du médicament et des produits de santé" (ANSM)	European Medicines Agency (EMA)	French National Authority for Health, "Haute Autorité de Santé" (HAS)	French RD networks, Filière de Santé Maladies Rares (FSMR)	French RD networks, Filière de Santé Maladies Rares (FSMR)	Orphanet
Dated	July 2017	July 2017	November 2017	January 2016-November 2017	September 2017	January 2018	January 2018	January 2018	January 2018
Source format	PDF (table)	PDF (table)	Table	Table	Table	Table	Table	Table	Database
Language	English	English	French	French	English	French	French	French	French
Source limitations	● Manual extraction of pathologies from MA ● Approximate denominations of pathologies vs. Orphanet nomenclature		● Difference of language between the tables ● Approximate denominations of pathologies vs. Orphanet nomenclature			● Manual identification of NDCP from French RD network websites ● Manual extraction of pathologies from MA ● Approximate denominations of pathologies vs. Orphanet nomenclature			-
Link	https://www.orpha.net/orphacom/cahiers/docs/GB/list_of_orphan_drugs_in_europe.pdf	https://www.orpha.net/orphacom/cahiers/docs/GB/list_of_orphan_drugs_in_europe.pdf	https://solidarites-sante.gouv.fr/soins-et-maladies/medicaments/professionnels-de-sante/autorisation-de-mise-sur-le-marche/article/autorisations-temporaires-d-utilisation-atu	https://www.ansm.sante.fr/Activites/Autorisations-temporaires-d-utilisation-ATU/ATU-nominative-Liste-des-specialites-autorisees/(offset)/5	https://www.ema.europa.eu/en/medicines/download-medicine-data#rare-disease-(orphan)-designations-section	https://www.has-sante.fr/jcms/c_1340879/fr/protocoles-nationaux-de-diagnostic-et-de-soins-pnds	https://solidarites-sante.gouv.fr/soins-et-maladies/prises-en-charge-specialisees/maladies-rares/article/l-offre-de-soins	https://solidarites-sante.gouv.fr/soins-et-maladies/prises-en-charge-specialisees/maladies-rares/article/l-offre-de-soins	https://www.orpha.net/consor/cgi-bin/index.php
